# Supplementary material for: An ion exchange mediated shape-preserving strategy for constructing 1-D arrays of porous CoS1.0365 nanorods for electrocatalytic reduction of triiodide
Source: Royal Society of Chemistry journal article supplement (doi:10.1039/c5ta00494b), 2015-01-01
Supplement: c5ta00494b1.pdf [file c5ta00494b1.pdf]

## Electronic Supplementary Information (ESI) †

### **Ion exchange mediated shape-preserving strategy for architecting 1-D arrays of porous $\text{CoS}_{1.0365}$ nanorods for electrocatalytic reduction of triiodide**

Supriya A. Patil,<sup>a</sup> Dipak V. Shinde,<sup>a</sup> Iseul lim,<sup>a</sup> Keumnam Cho,<sup>a</sup> Sambhaji S.Bhande,<sup>b</sup> Rajaram S. Mane,<sup>b</sup> Nabeen K. Shrestha,<sup>a\*</sup> Joong Kee Lee,<sup>c</sup> Tae Hyun Yoon,<sup>a</sup> Sung-Hwan Han,<sup>a\*</sup>

<sup>a</sup>Department of Chemistry, Hanyang University, Sungdong-gu, Haengdang-dong 17, Seoul 133-791, Republic of Korea.

<sup>b</sup>Center for Nanomaterials and Energy Devices, School of Physical Sciences, Swami Ramanand Teerth Marathwada University, Nanded 4316006, India.

<sup>c</sup>Energy Storage Research Centre, Korea Institute of Science and Technology, Hwarangno 14-gil 5, Seongbuk-gu, Seoul 136-791, Republic of Korea.

---

\*E-mail; [nabeenkshrestha@hotmail.com](mailto:nabeenkshrestha@hotmail.com); [shhan@hanyang.kr.ac](mailto:shhan@hanyang.kr.ac)

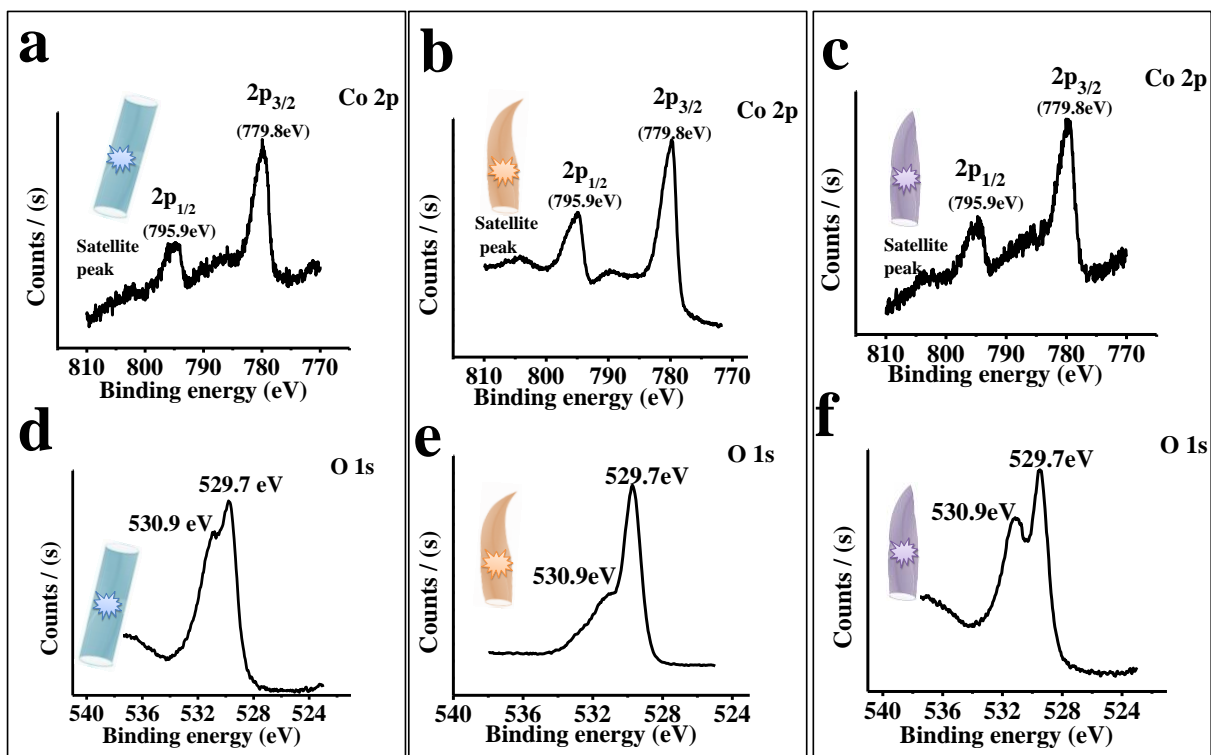

**Fig. S1.** Co 2p and O 1s core level XPS spectra of various shaped  $\text{Co}_3\text{O}_4$  nanorod films: (a) Nb, (b) BNr, and (c) Nn.

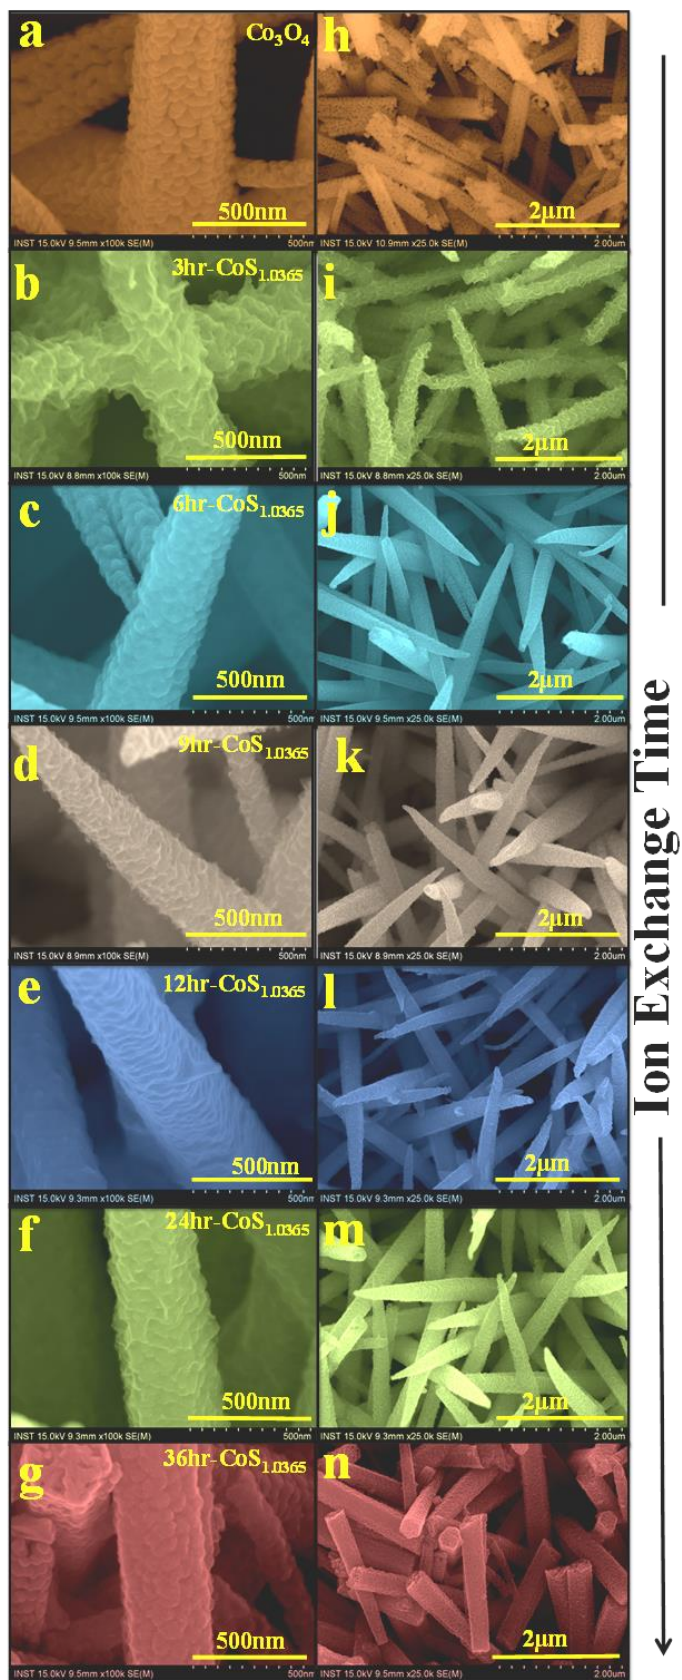

**Fig. S2.** SEM top views of  $\text{Co}_3\text{O}_4$  nanorod film before (a), and after ion exchange reaction for (b) 3 h, (c) 6 h, (d) 9 h, (e) 12 h, (f) 24 h, and (g) 36 h. Images (h) ~ (n) correspond to low magnified SEM views shown on left column.

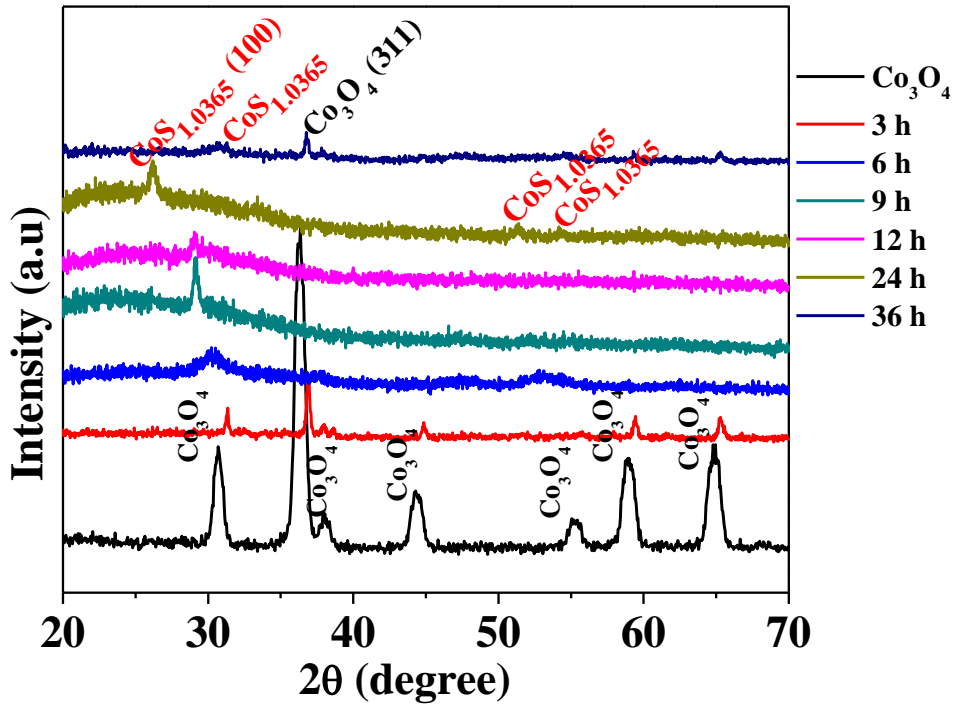

**Fig. S3.** XRD pattern for 1-D of  $\text{Co}_3\text{O}_4$  Nb array and time dependent ion exchange for Nb- $\text{CoS}_{1.0356}$ .

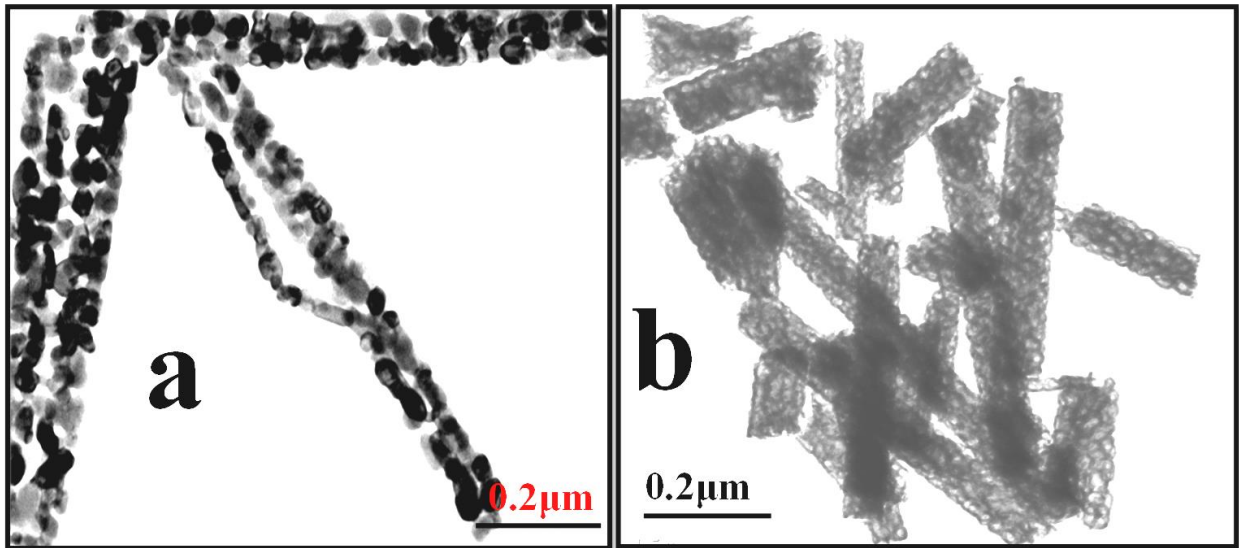

**Fig. S4.** TEM images of nanorods scaped from film of (a)  $\text{Co}_3\text{O}_4$ , and (b) 24 hr- $\text{CoS}_{1.0365}$  nanorods.

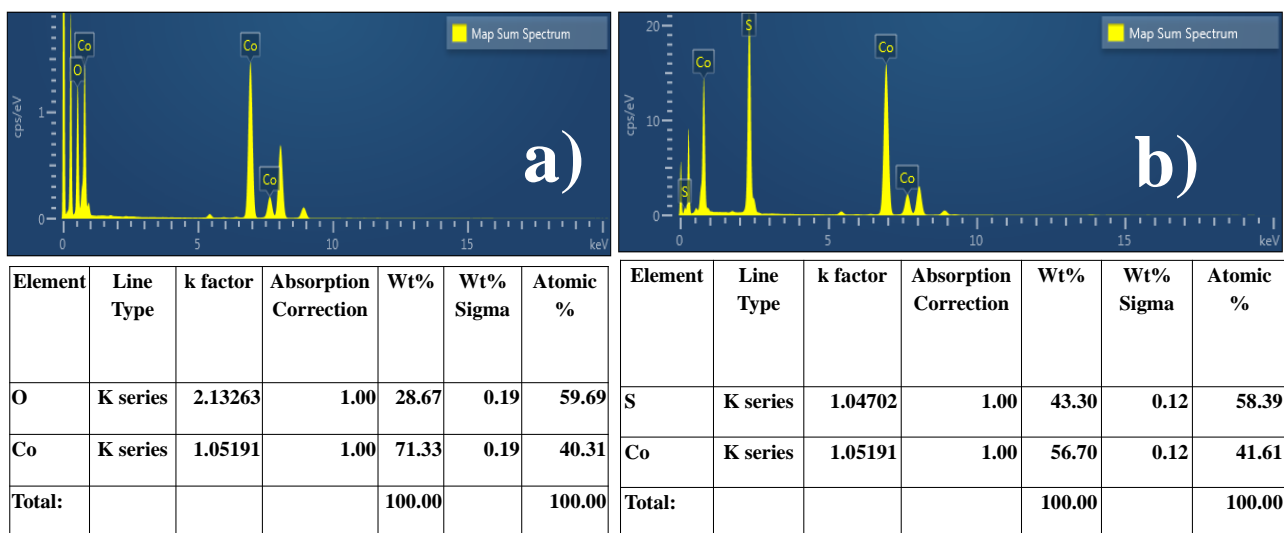

**Fig. S5.** Energy-dispersive X-ray spectroscopy analysis of (a)  $\text{Co}_3\text{O}_4$  Nb, and (b) 24 hr- $\text{CoS}_{1.0365}$  Nb film powder scraped from FTO glass substrate for analysis.

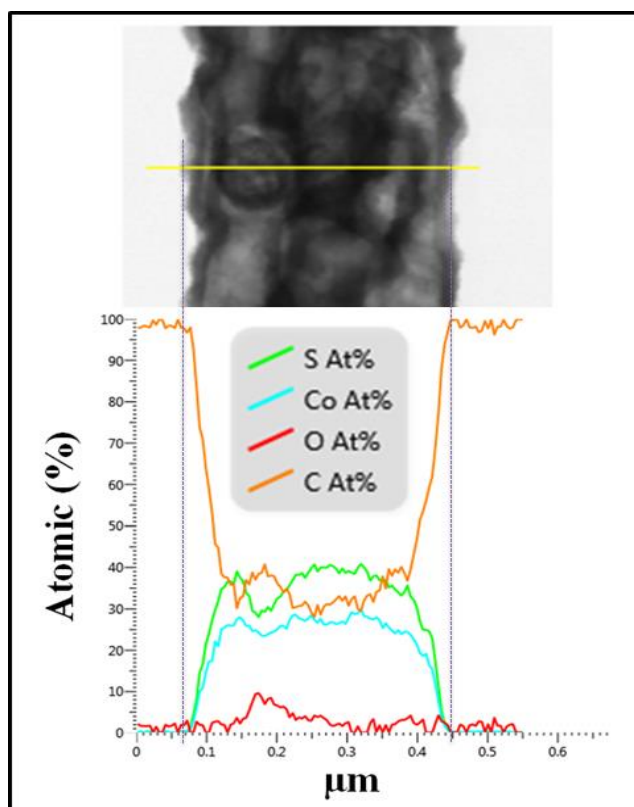

**Fig. S6** Line scanning TEM-EDS analysis of the one week aged 24 hr- $\text{CoS}_{1.0365}$  nanorod in dark at normal temperature and pressure of laboratory, showing distribution profile of various elements.

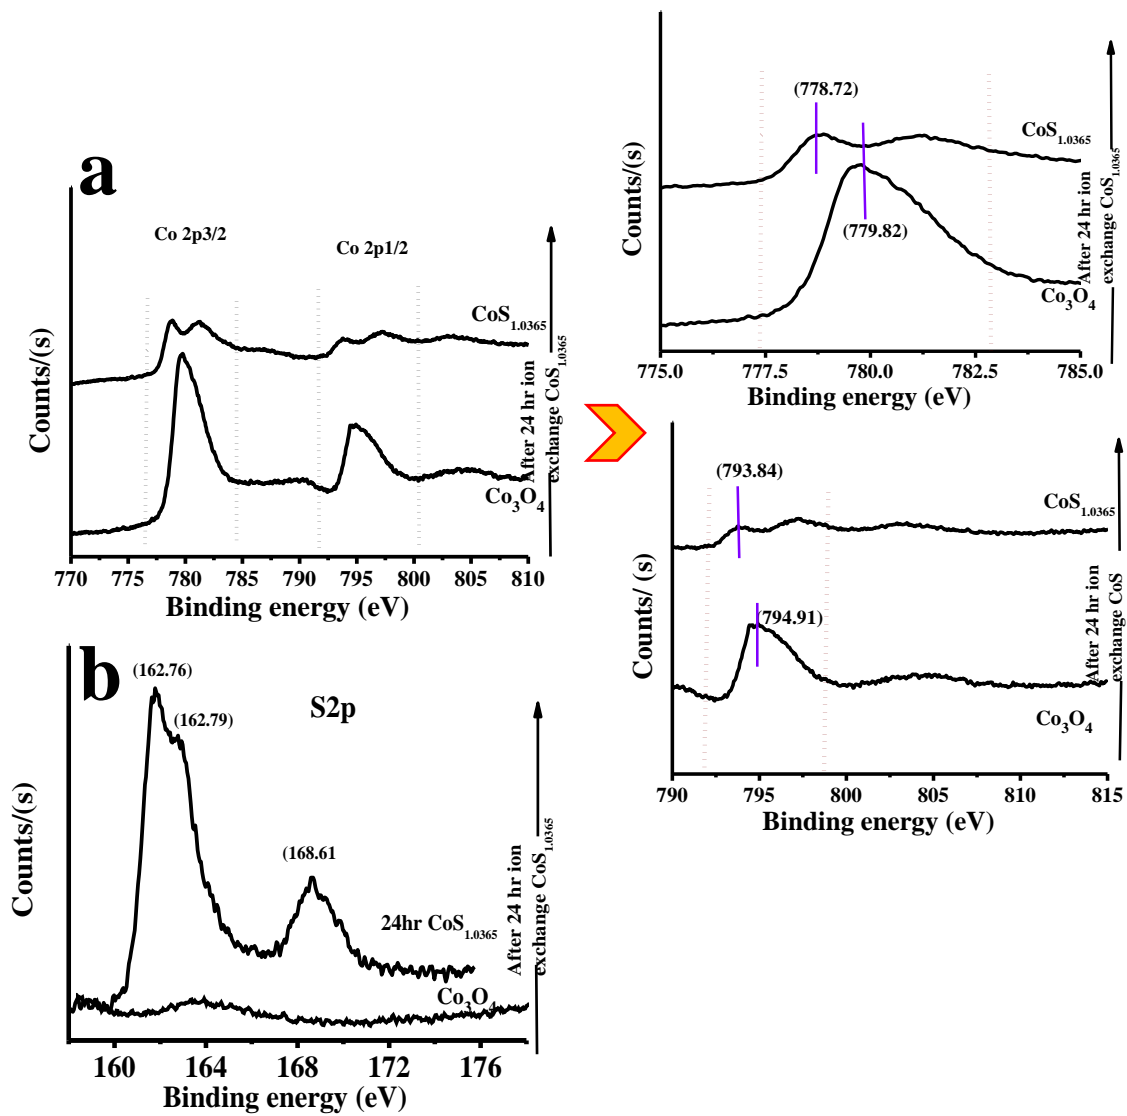

**Fig. S7.** XPS spectra of 24 hr-CoS<sub>1.0365</sub> in the region of (a) Co 2p, and (b) S 2p.
